# Supplementary material
Source: PubMed Central journal article supplement (PMC5001887)
Supplement: NIHMS800500-supplement-Supplemental_figures.pdf [file NIHMS800500-supplement-Supplemental_figures.pdf]

Figure S.I.

## A LR-ADP

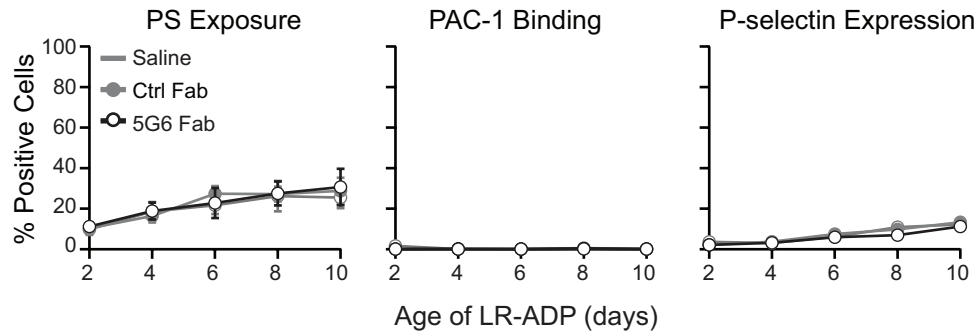

## B hTg PRP

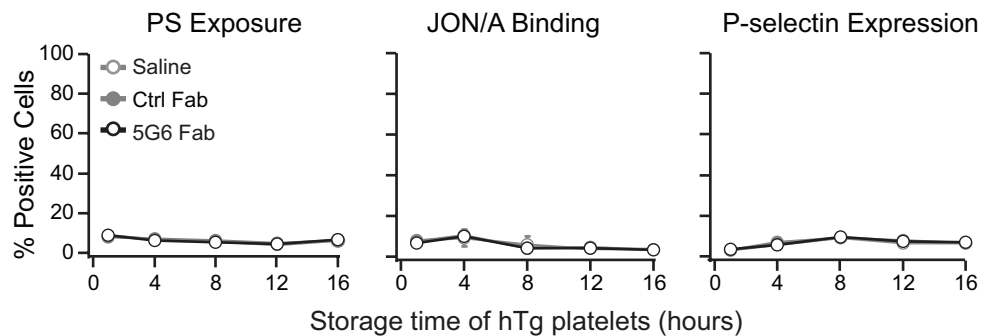

**Figure SI. 5G6 Fab dose not alter the activation state of stored platelets.**

LR-ADP (A) and hTg PRP (B) that had been stored with PBS (grey open circle), Ctrl Fab (grey filled circle) or 5G6 Fab (black open circle) were assessed for phosphoserine (PS) exposure and two activation markers (activated  $\alpha IIb\beta 3$  and P-selectin) by flow cytometry. PS exposure was detected by the binding of GFP-LactC2, and P-selectin expression by binding of anti-P-selectin mAb. Activation of integrin  $\alpha IIb\beta 3$  was detected by the binding of mAb PAC-1 (LR-ADP) or JON/A (hTg PRP). Data are shown as mean  $\pm$  SEM ( $n=5$ ). Note in some cases the error bar is smaller than the symbol.

**Figure S.II.**

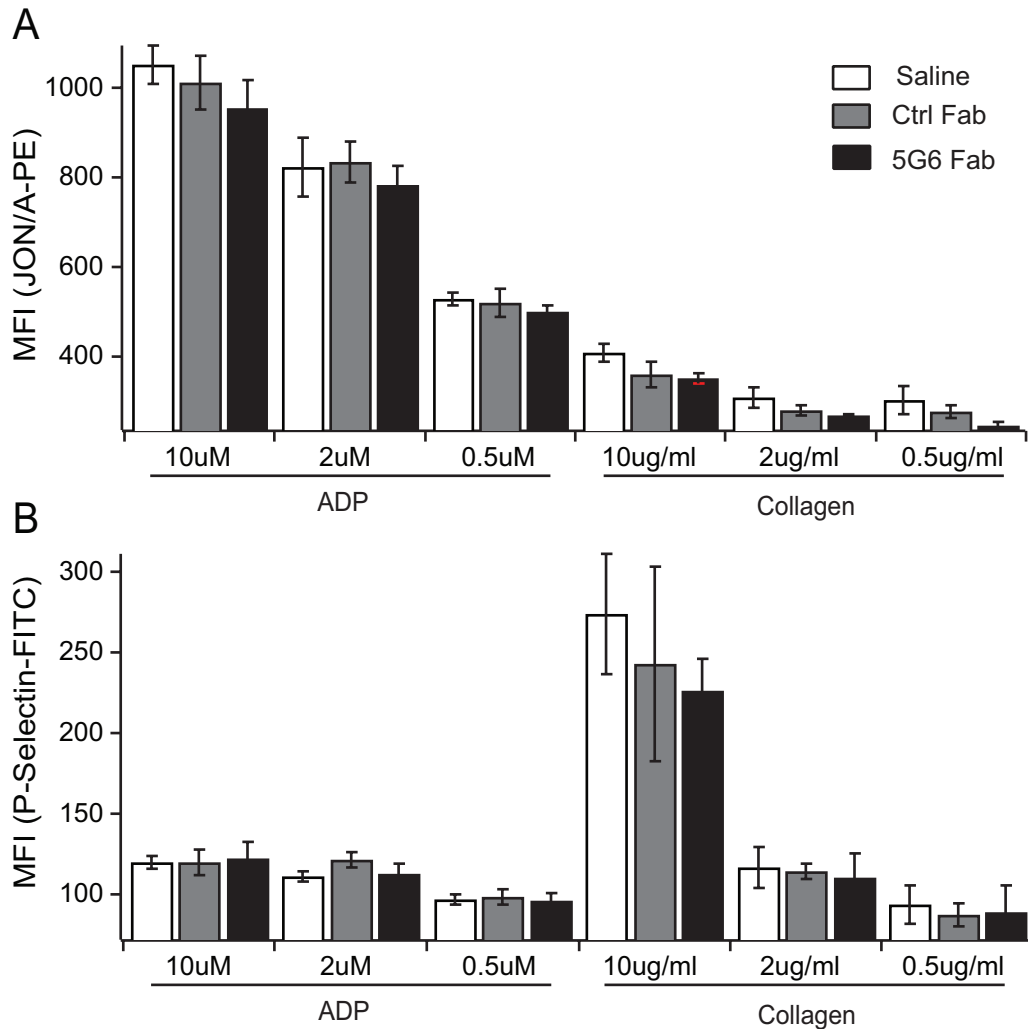

**Figure SII. 5G6 Fab does not alter integrin activation and P-selectin exposure in response to ADP and collagen**

Flow cytometric analysis of  $\alpha IIb\beta 3$  activation and P-selectin exposure in stored hTg platelets. The hTg platelets were stored at room temperature with PBS (blank), Ctrl Fab (black) or 5G6 Fab (red) for 16 hours. Stored platelets were then stimulated with indicated concentrations of ADP or collagen for 15 minutes, and integrin  $\alpha IIb\beta 3$  activation (A) and P-selectin exposure (B) were measured using JON/A antibody and anti-P-selectin antibody respectively. Results are depicted as MFI  $\pm$  SEM (n=6).
